# Supplementary material
Source: PubMed Central journal article supplement (PMC6179911)
Supplement: NIHMS1503856-supplement-1.pdf [file NIHMS1503856-supplement-1.pdf]

Supplemental data

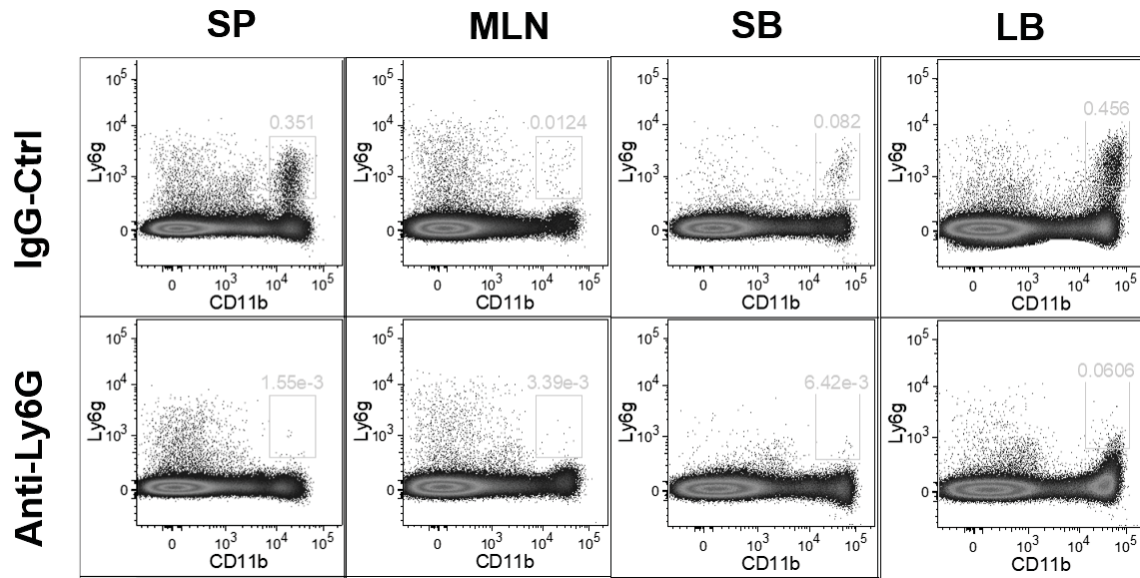

**Figure S1. The anti-Ly6g antibody efficiently depleted neutrophils in different tissues.** In DSS-induced colitis model, WT mice received Ly6G-depleting antibody (4 mg/kg) every 3 days. Neutrophil depletion in the spleen, Mesenteric lymph nodes (MLN), small bowel (SB), and large bowel (LB) was measured by flow cytometry. n = 4 per group per experiment. FACS plots are representative of 2 independent experiments.

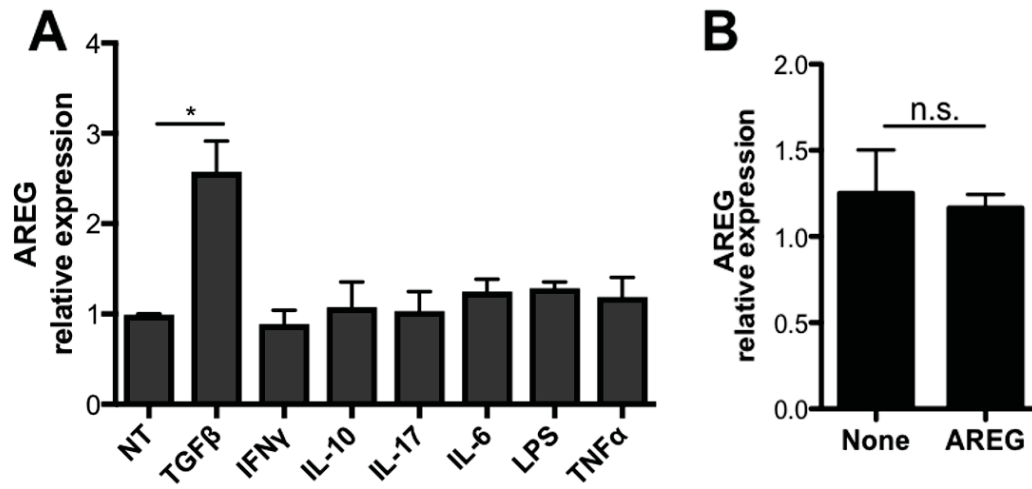

**Figure S2. TGFβ induces AREG production in primary IECs.** (A and B) mRNA expression level of AREG in isolated primary IECs treated with (A) different reagents, and (B) AREG. The data were normalized to one sample of 3 in nontreatment control group. n.s., no significant difference; Data are presented as mean ± SEM of three independent experiments; \*\*\*P < 0.001 one-way ANOVA.

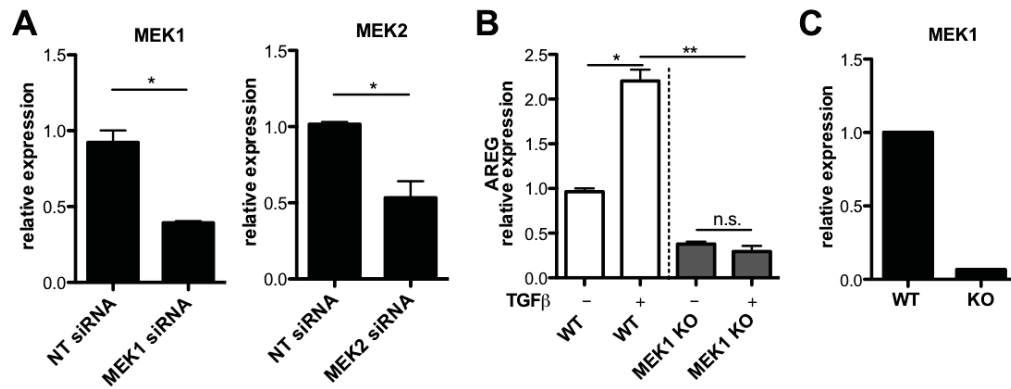

**Figure S3. MEK1/2 regulates TGFβ-induced AREG production in IECs.** (A) Transfection efficiency of siRNA targeted either MEK1 or MEK2 in MSIE cells. (B and C) MEK1 was knocked out in MSIE cells by CRISPR, and then treated with TGFβ for 6 h. (B) mRNA expression level of AREG in WT and MEK1 KO MSIE cells. (C) CRISPR knock out efficiency. n.s., no significant difference; Data are presented as mean ± SEM of three independent experiments. \*P < 0.05, \*\*P < 0.01 Student's t test, one-way ANOVA.

**Table S1. PCR primers and CRISPR-guide RNA oligo sequences**

---

## PCR primers

|               |         |                                |
|---------------|---------|--------------------------------|
| mGAPDH        | Forward | 5'-CCATGGAGAAGGCTGGGG-3'       |
|               | Reverse | 5'-CAAAGTTGTCATGGATGACC-3'     |
| mAREG         | Forward | 5'-CCTCCTTCTTTCTTCTGTTTCTCC-3' |
|               | Reverse | 5'-GTCACTATCTTTGTCTCTGCCA-3'   |
| TGF $\beta$   | Forward | 5'-TGACGTCACTGGAGTTGTACGG -3'  |
|               | Reverse | 5'-GGTTCATGTCATGGATGGTGC-3'    |
| HNF4 $\alpha$ | Forward | 5'-TGTTCTTGCATCAGGTGAGG-3'     |
|               | Reverse | 5'-TCCAGTTCATCAAGCTCTTCG-3'    |
| hGAPDH        | Forward | 5'-GAAGGTCGGAGTCAACGGATT-3'    |
|               | Reverse | 5'-CGCTCCTGGAAGATGGTAAT-3'     |
| hAREG         | Forward | 5'-CGAACCACAAATACCTGGCTA-3'    |
|               | Reverse | 5'-TCCATTTTTGCCTCCCTTTT-3'     |

## CRISPR-guide RNA oligo sequences

|      |         |                                  |
|------|---------|----------------------------------|
| MEK1 | Forward | 5' -CACCGCTTGTGCTTCTCCCGAAGAT-3' |
|      | Reverse | 5' -AAACATCTTCGGGAGAAGCACAAGC-3' |

---
